## ER $\beta$ alters the chemosensitivity of luminal breast cancer cells by regulating p53 function

Igor Bado<sup>1</sup>, Eric Pham<sup>2</sup>, Benjamin Soibam<sup>3</sup>, Fotis Nikolos<sup>1</sup>, Jan-Åke Gustafsson<sup>1,4</sup> and Christoforos Thomas<sup>1</sup>

<sup>1</sup>Department of Biology and Biochemistry, Center for Nuclear Receptors and Cell Signaling, University of Houston, Houston, Texas, USA

<sup>2</sup>Department of Biology and Biochemistry, University of Houston, Houston, Texas, USA

<sup>3</sup>Department of Computer Science and Engineering Technology, University of Houston-Downtown, Houston, Texas, USA

<sup>4</sup>Center for Innovative Medicine, Department of Biosciences and Nutrition, Karolinska Institutet, Huddinge, Sweden

**Correspondence to:** Christoforos Thomas, **email:** thomaschristoforos@gmail.com

**Keywords:** estrogen receptor  $\beta$ ; p53; breast cancer; DNA damage response; therapy response

**Received:** September 27, 2017

**Accepted:** March 21, 2018

**Published:** April 27, 2018

**Copyright:** Bado et al. This is an open-access article distributed under the terms of the Creative Commons Attribution License 3.0 (CC BY 3.0), which permits unrestricted use, distribution, and reproduction in any medium, provided the original author and source are credited.

### ABSTRACT

**Estrogen receptor  $\alpha$  (ER $\alpha$ )-positive breast cancers tend to develop resistance to both endocrine therapy and chemotherapy. Despite recent progress in defining molecular pathways that confer endocrine resistance, the mechanisms that regulate chemotherapy response in luminal tumors remain largely elusive. Luminal tumors often express wild-type p53 that is a major determinant of the cellular DNA damage response. Similar to p53, the second ER subtype, ER $\beta$ , has been reported to inhibit breast tumorigenesis by acting alone or in collaboration with p53. However, a synergistic mechanism of action has not been described. Here, we suggest that ER $\beta$  relies on p53 to elicit its tumor repressive actions in ER $\alpha$ -positive breast cancer cells. Upregulation of ER $\beta$  and treatment with ER $\beta$  agonists potentiates the tumor suppressor function of p53 resulting in decreased survival. This effect requires molecular interaction between the two proteins that disrupts the inhibitory action of ER $\alpha$  on p53 leading to increased transcriptional activity of p53. In addition, we show that the same interaction alters the chemosensitivity of endocrine-resistant cells including their response to tamoxifen therapy. Our results suggest a collaboration of ER $\beta$  and p53 tumor suppressor activity in breast cancer cells that indicates the importance of ligand-regulated ER $\beta$  as a tool to target p53 activity and improve the clinical management of resistant disease.**

### INTRODUCTION

Nearly 70% of diagnosed breast cancers belong to estrogen receptor alpha (ER $\alpha$ )-positive phenotype [1, 2]. Treatment with the antiestrogen tamoxifen that alters the conformation of ER $\alpha$  that is induced by 17 $\beta$ -estradiol is the standard treatment option for these tumors [3]. However, *de novo* and acquired resistance to endocrine therapy is developed in 50% of the cases [4]. Only part of the mechanism that links estrogen signaling to therapy resistance has been elucidated including the altered

expression and/or post-translational modification of ER $\alpha$  that results in aberrant activity [5]. The discovery of ER $\beta$  indicated the complexity of estrogen signaling and suggested the possibility of the second ER to interfere with the pathways that contribute to resistant phenotypes. Both ER $\alpha$  and ER $\beta$  are transcription factors that regulate a plethora of genes by acting on estrogen-response-elements (ERE) or by interacting with other transcription factors [5, 6]. Despite similarities in the structure and the mechanism of action, the two ER subtypes elicit distinct transcriptional responses and differentially affect cancer

cellular processes which may imply separate roles in therapy resistance.

In addition to estrogen receptor activity, other factors that regulate cell survival have been associated with therapy resistance in breast cancer. Among these, the p53 protein that is expressed in its wild-type form in approximately 80% of ER $\alpha$ -positive breast cancers [8, 9]. As a tumor suppressor, p53 regulates cell-cycle arrest, DNA repair, apoptosis and senescence through induction of downstream effectors including cyclin-dependent kinase inhibitor 1 (p21<sup>WAF1</sup>), growth arrest and DNA-damage-inducible alpha (GADD45A), p53 upregulated modulator of apoptosis (PUMA), BCL-2-like protein 4 (BAX), plasminogen activator inhibitor-1 (PAI-1), and NOXA [10–13]. In response to stress, p21 promotes G<sub>1</sub>/S cell cycle arrest [14] and the BCL-2 family member PUMA induces apoptosis by primarily activating the pro-apoptotic proteins BAX and/or BAK in mitochondria [15]. Upon genotoxic stress, GADD45A induces growth arrest and apoptosis by interacting with p21 and CDC2 and PAI-1 is essential for replicative senescence [16–20]. In addition to downstream effectors, regulators of p53 expression and activity affect its tumor suppressor function. In response to DNA damage, ATM and ATR upregulate p53 through phosphorylation that disturbs its interaction with the ubiquitin ligase MDM2. Upregulation of MDM2 in breast carcinomas results in accelerated p53 degradation and is associated with worse prognosis [21–24]. Similar to MDM2, the ubiquitin ligase MDMX directly impedes p53 transcriptional activity or heterodimerizes with MDM2 to induce p53 degradation [25]. Consequently, due to its pivotal impact on cell survival signaling, deregulation of the p53 pathway is an important step in the process that leads to resistant tumor phenotypes [26, 27]. Altered activity of this pathway has been associated with resistance to ER-targeted therapies and chemotherapies [28]. However, what signaling mitigates wild-type p53 activity in ER $\alpha$ -positive tumors is still poorly understood.

Activation of the p53 pathway has been inversely associated with ER $\alpha$  activity in breast cancer. While ER $\alpha$  levels increase during the development of breast cancer, p53 expression is lower in luminal tumors compared with the normal mammary gland [29]. The inverse association between the two proteins reflects their opposite roles during malignant transformation and may account for the early onset breast tumors that are induced by exogenous estrogen in absence of p53 [30]. At the molecular level, despite the proposed involvement of ER $\alpha$  in regulation of p53 expression [31], the receptor is likely to act on p53 transcriptional activity. ER $\alpha$  was indeed found to bind to and repress p53-dependent transcription and its associated tumor suppressor function [32–34] and disruption of this interaction by radiation restores p53 function [35, 36]. In contrast to ER $\alpha$  and similar to p53 downregulation, ER $\beta$  expression decreases in breast cancer [37, 38]. The reduced

levels of the two proteins in human tumors may explain the observed collaboration of ER $\beta$  and p53 inactivation in mouse breast tumor development [37]. This may imply an ER $\beta$ -p53 transcriptional cooperation that inhibits tumor-associated phenotypes. ER $\beta$  has so far been shown to interact with and inhibit the pro-invasive properties of mutant p53 [7]. Thus, the p53 tumor suppressor activity in breast cancer may be differentially regulated by the two ER subtypes when both are expressed in cancer cells [39, 40]. In such cellular context, by heterodimerizing with ER $\alpha$ , ER $\beta$  can oppose the pro-survival function of ER $\alpha$  [41–44]. Despite that aspects of the molecular estrogen receptor-p53 associations are not completely understood, it is evident that the p53 pathway is regulated by estrogen and adjusting ER activity with ER-subtype specific ligands may control p53-dependent tumor suppressor function. The objective of the present study was to investigate whether ER $\beta$  transcriptionally cooperates with p53 to impact survival and chemosensitivity of luminal breast cancer cells. Here, we show that ER $\beta$  enhances wild-type p53 transcriptional activity proposing a new mechanism that is employed by the receptor to elicit tumor repressive actions in breast cancer.

## RESULTS

### ER $\beta$ regulates p53 transcriptional activity

The expression of full length ER $\beta$  has been associated with better survival in breast cancer [45–47]. Despite the proposed mechanisms of action, it is still poorly understood how the receptor is linked to less aggressive tumor phenotypes [6, 36, 47, 44–46]. ER $\beta$  deletion has recently been reported to collaborate with p53 inactivation to induce early onset breast tumors in mice [37] suggesting that ER $\beta$  synergizes with wild-type p53 to elicit anti-tumor activities in breast cancer cells. To test whether such synergism impacts the clinical outcome of patients with breast cancer, we tested the correlation between the combined expression of ER $\beta$  and p53 and relapse free survival in published Kaplan Meier (KM) plotter datasets and found that ER $\beta$ <sup>high</sup>/p53<sup>high</sup> patients have better prognosis than ER $\beta$ <sup>low</sup>/p53<sup>low</sup> patients in ER $\alpha$ -positive breast cancer cohort (Supplementary Figure 1A). To investigate whether ER $\beta$  relies on such synergism to exert its repressive actions in breast cancer, we analyzed breast cancer cells that carry wild-type p53 for expression of p53-regulated genes that are involved in cell-cycle arrest, apoptosis, and senescence including p21, GADD45A, PUMA, PAI-1, BAX, and promyelocytic leukemia protein (PML). To ascertain the functionality of p53 in ER $\alpha$ -positive MCF-7 cells, we measured the expression of these genes after exposing the cells to genotoxic stress imposed by the DNA-crosslinking agent cisplatin. By inducing DNA-damage, cisplatin stabilizes p53 promoting its nuclear translocation and transcriptional

activation [49]. Consistent with previous studies, a strong upregulation of PUMA, GADD45A, and p21 mRNA was observed in MCF-7 cells after treatment with 10  $\mu$ M cisplatin confirming the link between DNA damage and p53 activation [11]. PAI-1 was slightly induced only after treatment with a higher drug concentration (20  $\mu$ M), while BAX that is post-transcriptionally regulated by cytoplasmic p53 through a mitochondria-dependent mechanism and PML did not respond to treatment (Figure 1A) [50]. Similar to cisplatin, upregulation of ER $\beta$  in MCF-7 cells significantly induced the expression of PUMA, PAI-1 and p21 but not GADD45A (Figure 1B). To corroborate the effects of ER $\beta$  on p53 transcriptional activity, we analyzed the mRNA levels of the same p53 target genes after transiently transfecting MCF-7 cells with siRNA [48] that silences ER $\beta$ . Downregulation of ER $\beta$  decreased the expression of all genes that were upregulated in ER $\beta$ -transfected MCF-7 cells (PAI-1, PUMA, p21) including GADD45A (Figure 1C). Analysis of publically available chromatin immunoprecipitation (ChIP) sequencing data revealed a strong co-enrichment of ER $\beta$  and p53 at regulatory elements of several p53 target genes including GADD45A in MCF-7 cells (Supplementary Figure 1B and Supplementary Table 1). Due to strong promoter binding, the transcriptional activity of endogenous ER $\beta$  in MCF-7 cells can account for increased levels of GADD45A that are not further affected by the transfected receptor explaining the alteration of GADD45A mRNA only upon ER $\beta$  knockdown. ER $\beta$  was previously shown to interact with mutant p53 in triple-negative breast cancer (TNBC) cells altering the expression of mutant p53-associated genes that regulate invasion [7]. To test whether a similar interaction in luminal cells affects the expression of p53 target genes that influence survival and apoptosis, we analyzed ER $\alpha$ -positive T47D cells that express mutant p53. As shown in Figure 1D, upregulation of ER $\beta$  in these cells significantly increased the expression of the p53 target genes BAX, GADD45, PUMA and NOXA suggesting that ER $\beta$  can activate the wild-type function of mutant p53. Re-activation of mutant p53 was previously demonstrated by small molecules that affect its interaction with other proteins [51]. Taken together, these results strengthen our hypothesis that ER $\beta$  plays a crucial role in regulating p53 transcriptional activity.

### **ER $\beta$ enhances p53 activity in response to genotoxic stress**

By inducing DNA damage response, cisplatin stabilizes p53 protein promoting its activity [52]. To examine whether ER $\beta$  affects chemotherapy-induced p53 tumor suppressor function, MCF-7 cells were analyzed for p53-dependent gene expression following ER $\beta$  downregulation using two different siRNAs and treatment with cisplatin for 24 hours. As shown in Figure

2A and Supplementary Figure 2, downregulation of ER $\beta$  prevented the cisplatin-induced expression of these genes, indicating that ER $\beta$  contributes to activation of wild-type p53 in response to genotoxic stress in luminal breast cancer cells. To validate our findings, we measured p53-dependent gene expression following upregulation of ER $\beta$  in the presence of chemotherapy. Our results revealed significant increase in the expression of p53 target genes after upregulation of ER $\beta$  in cisplatin-treated MCF-7 cells (Figure 2B). Importantly, the expression of BAX that was not affected by either cisplatin alone or ER $\beta$  upregulation (Figure 1A and 1B), increased following combined treatment, suggesting a synergistic ER $\beta$ -p53 function (Figure 2B). To corroborate our findings, we evaluated the effects of ER $\beta$  on ZR-75-1 cells that represent another cell model of ER $\alpha$ -positive breast cancer that expresses wild-type p53 protein. Consistent with the MCF-7 cells, induction of ER $\beta$  expression in ZR-75-1 cells significantly upregulated most of the p53 target genes in absence and presence of chemotherapy demonstrating the importance of ER $\beta$  in enhancing p53 transcriptional activity under basal conditions or in response to genotoxic stress (Figure 2C). To investigate the clinical importance of these common ER $\beta$  and p53 target genes, we examined whether their expression is associated with relapse-free survival in published KM plotter datasets [53]. As shown in Supplementary Figure 1C, increased expression of GADD45A, PUMA, p21 and PAI-1 correlates with better prognosis in patients with ER $\alpha$ -positive breast cancer after endocrine therapy and chemotherapy. Given, that both MCF-7 and ZR-75-1 cells express significant amount of ER $\alpha$ , the formation of ER $\alpha$ -ER $\beta$  heterodimers may account for the ability of ER $\beta$  to regulate the function of p53. Hence, we sought to determine whether ER $\beta$  can affect p53 transcriptional activity in ER $\alpha$ -deficient and non-tumorigenic mammary epithelial MCF-10A cells. Upregulation of ER $\beta$  in these cells increased the expression of the p53 target genes GADD45, p21 and PAI-1 but not PUMA that was strongly upregulated in ER $\alpha$ -positive breast cancer cell lines (Figure 2D). Given the specific pro-apoptotic function of PUMA, these results indicate a selective pro-apoptotic effect of the receptor in breast cancer cells. In addition, the ER $\beta$ -mediated increased expression of p53-target genes in MCF-10A cells suggests that ER $\beta$  can influence p53 function independently of ER $\alpha$ .

### **ER ligands modulate p53 function**

To ascertain the effect of endogenous ER $\beta$  on inducing p53 tumor suppressive activity, we evaluated the impact of ER subtype-specific ligands on the expression of p53-regulated genes in ER $\alpha$ -positive MCF-7 cells. Among these compounds, 17 $\beta$ -estradiol (E2) binds to and activates both receptors and its growth stimulatory effects are linked to activation of the pro-survival ER $\alpha$

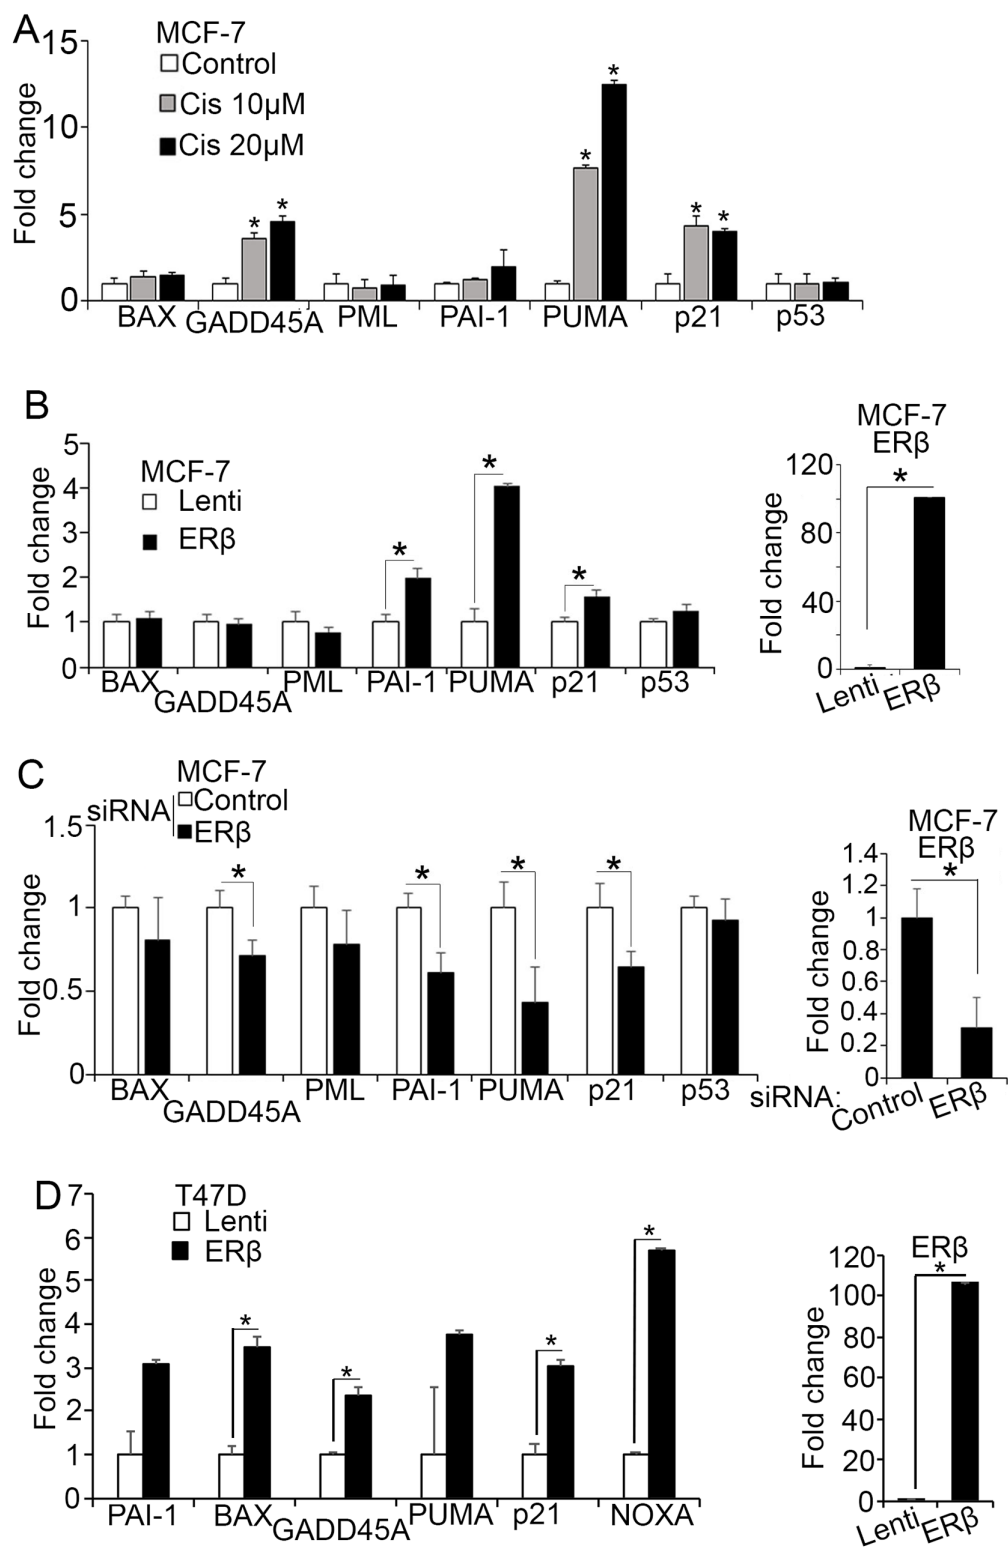

**Figure 1: ER $\beta$  increases p53 transcriptional activity.** (A) MCF-7 cells were left untreated (Control) or treated with 10  $\mu$ M or 20  $\mu$ M cisplatin for 24 hours and mRNA expression of p53 target genes was analyzed by real-time PCR. Values were normalized to that of the untreated cells that was set to 1. (B) mRNA expression of p53 target genes in control (Lenti) and ER $\beta$ -expressing MCF-7 cells. Values were normalized to control cells. (C) mRNA expression of p53 target genes in MCF-7 cells after transfection with control or siRNA#1 against ER $\beta$ . (D) mRNA levels of p53 target genes in control (Lenti) and ER $\beta$ -expressing T47D cells. In all graphs, values represent the mean  $\pm$  S.D. of three independent experiments; \* $P \leq 0.05$ .

that is expressed in higher levels in luminal cancer cells compared with ER $\beta$  [7]. Consistent with its pro-survival action, E2 reduced the expression of p53 target genes, apparently through the activation of ER $\alpha$  that is known to inhibit p53 transcriptional activity (Figure 3A) [27, 35].

Treatment of the cells with the ER $\alpha$ -specific antagonist 4-hydroxytamoxifen (4-OHT) reversed the E2-reduced expression of the same genes (Figure 3A), indicating the importance of ER $\alpha$  in mediating the effect of E2 on p53 transcriptional activity in ER $\alpha$ -positive breast cancer cells.

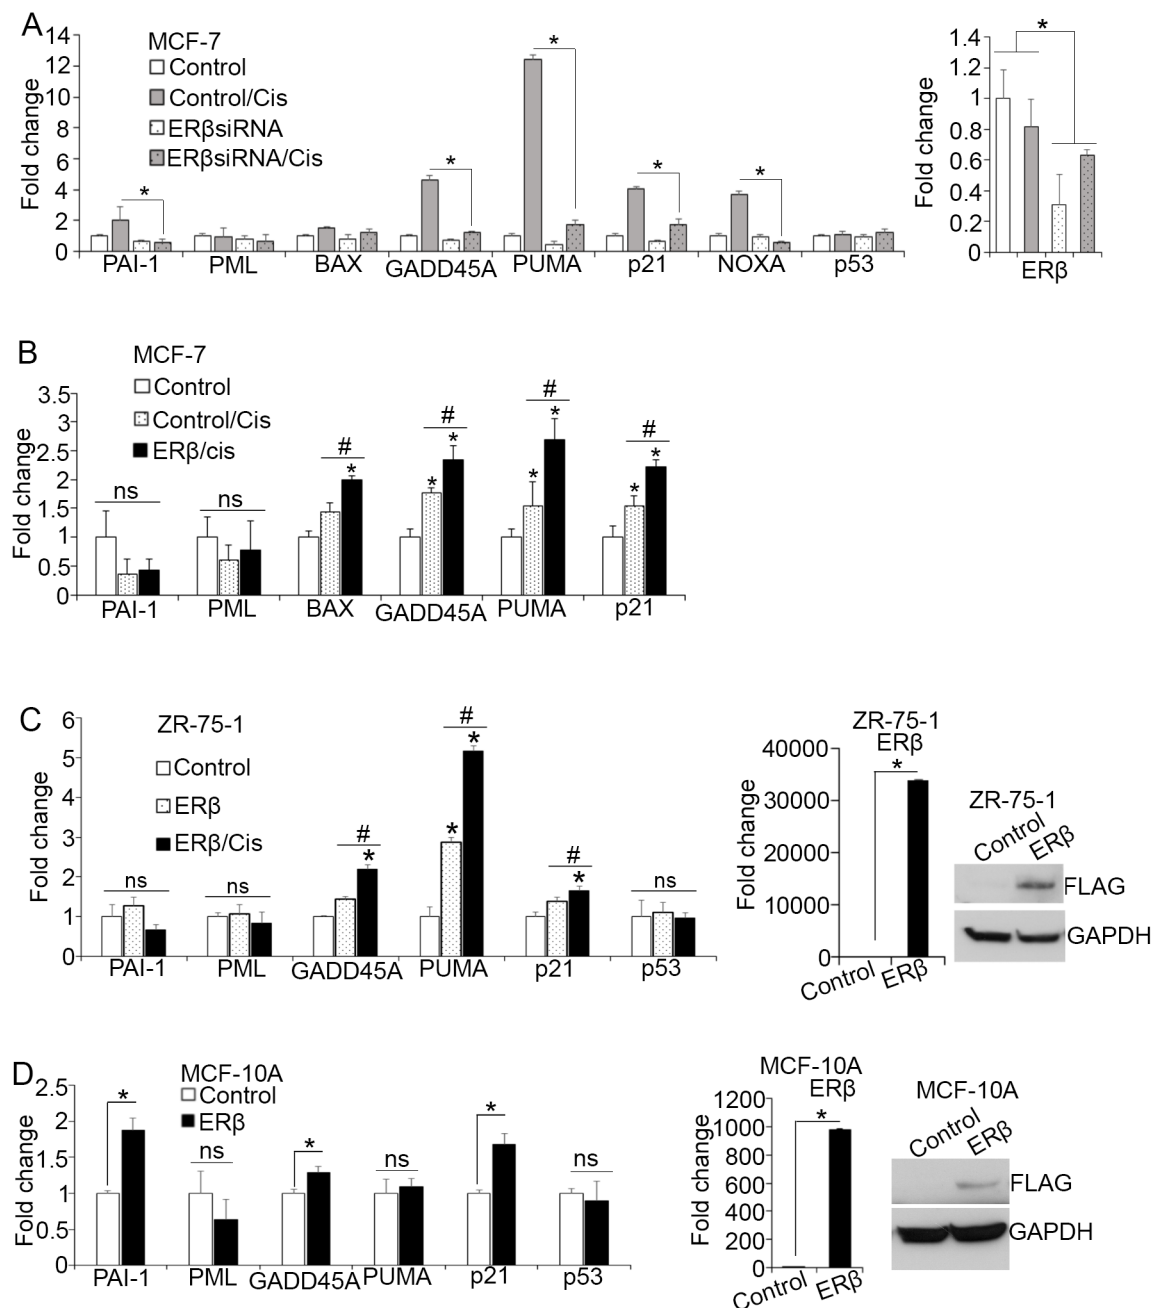

**Figure 2: ER $\beta$  alters p53-dependent transcription in response to chemotherapy.** (A) mRNA levels of p53 target genes in MCF-7 cells following transfection with control (Control) or siRNA#1 against ER $\beta$  and treatment with vehicle or 20  $\mu$ M cisplatin for 24 hours. Values were normalized to the untreated control cells. (B) mRNA expression of p53 target genes in control and ER $\beta$ -expressing MCF-7 cells following treatment with vehicle or 20  $\mu$ M cisplatin. Values were normalized to the untreated control cells. (C) Left: mRNA levels of p53 target genes in control and ER $\beta$ -expressing ZR-75-1 cells after treatment with vehicle or 20  $\mu$ M cisplatin. Right: mRNA and protein levels of ER $\beta$  in control and ER $\beta$ -expressing ZR-75-1 cells. (D) Left: Expression of p53 target genes in control and ER $\beta$ -expressing MCF-10A cells. Right: mRNA and protein levels of ER $\beta$  in control and ER $\beta$ -expressing MCF-10A cells. In all graphs, values represent the mean  $\pm$  S.D. of three experiments; \* $P \leq 0.05$ .

To study the effects of specific activation of ER $\beta$ , cells were exposed to diarylpropionitrile (DPN), a selective ER $\beta$  agonist. As expected, DPN enhanced the expression of p53 target genes in MCF-7 cells (Figure 3A). In addition to tamoxifen, the selective ER $\alpha$  degrader fulvestrant (ICI182780) inhibits the growth stimulatory actions of estrogen [54]. In the absence of E2, treatment of MCF-7 cells with ICI182780 caused a decrease in the expression of p53 target genes (Figure 3B). In addition to acting as an ER $\alpha$  antagonist, ICI182780 has been shown to induce ER $\beta$ -mediated tumor repressive actions [55, 56]. Based on this evidence, we examined whether upregulation of ER $\beta$  alters the effect of ICI182780 on p53-dependent gene expression. Indeed, induction of ER $\beta$  expression in ICI-treated MCF-7 cells significantly upregulated the p53-regulated genes (Figure 3B), suggesting that ICI182780 can act as an ER $\beta$  agonist on p53-dependent gene expression in luminal cells. Moreover, as ER $\beta$  correlates with better response to chemotherapy in breast cancer [45], we investigated whether the ER $\beta$ -specific agonist DPN enhances p53 tumor suppressor activity in chemotherapy-

treated cells. Treatment with DPN significantly potentiated the effect of cisplatin on p53-dependent gene transcription (Figure 3C), indicating a synergism between ER $\beta$  and p53 that may account for some of their previously observed anti-tumor effects in breast cancer [31, 37].

### ER $\beta$ increases the chemotherapy sensitivity of ER $\alpha$ -positive breast cancer cells

Based on our findings showing that ER $\beta$  increases the transcriptional activity of p53 in breast cancer cells, we investigated whether the receptor alters the chemosensitivity of these cells. We first determined the sensitivity of chemotherapy-treated MCF-7 cells following upregulation of ER $\beta$ . As shown in Figure 4A, cisplatin treatment caused a significantly stronger decrease in the survival of ER $\beta$ -expressing compared with the control MCF-7 cells. This effect may reflect the increased expression of p53 target genes that was observed following upregulation or activation of ER $\beta$  in cisplatin-treated cells (Figures 2 and 3C). The survival of the cisplatin-treated,

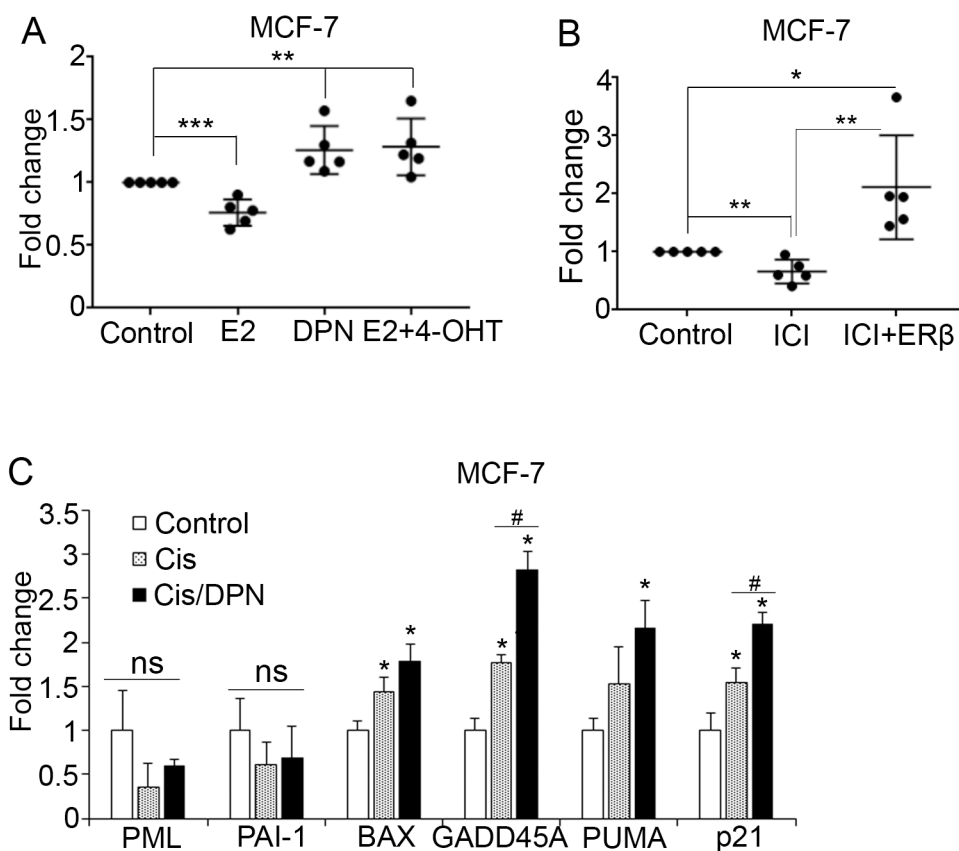

**Figure 3: ER ligands modulate p53 function.** (A) Dot blot depicting the fold change of mRNA expression of p53 target genes in MCF-7 cells following treatment with vehicle (Control) or the ER subtype-specific ligands 17 $\beta$ -estradiol (E2, 10 nM), Diarylpropionitrile (DPN, 10 nM), or combination of E2 and 1  $\mu$ M 4-hydroxytamoxifen (4-OHT) for 24 hours. Values were normalized to the untreated cells. (B) Dot blot representing the fold change of mRNA expression of p53 target genes in control and ER $\beta$ -expressing MCF-7 cells after treatment with 10 nM fulvestrant (ICI) for 24 hours. (C) mRNA levels of p53 target genes in MCF-7 cells following treatment with vehicle (Control), 20  $\mu$ M cisplatin (Cis) or combination of 20  $\mu$ M cisplatin and 10 nM DPN. Values were normalized to the untreated cells. In all graphs values represent the mean  $\pm$  S.D. of three different experiments; \* $P \leq 0.05$ .

ER $\beta$ -expressing MCF-7 cells was not further altered by E2 or the ER $\beta$ -specific agonist DPN (Figure 4B). In contrast, a dramatic increase in the sensitivity of the same cells was observed after treatment with tamoxifen suggesting an association of ER $\beta$  with response to endocrine therapy following p53 upregulation (Figure 4C). To investigate whether a similar association occurs in the clinical setting, we tested the correlation of ER $\beta$  and p53 co-expression with relapse-free survival in published KM plotter datasets [53]. As shown in Supplementary Figure 1D, ER $\beta^{\text{high}}$ /p53 $^{\text{high}}$  breast cancer patients have better clinical outcome than ER $\beta^{\text{low}}$ /p53 $^{\text{low}}$  patients following therapy with tamoxifen. In addition, we stratified ER $\alpha$ -positive/HER2-negative patients that respond better to endocrine therapy in those with tumors that have wild-type p53 and any p53 status. High ER $\beta$  expression was associated with significantly better survival only in patients with wild-type p53 indicating that the presence of a functional p53 is important for the anti-tumor activity of ER $\beta$  (Supplementary Figure 1E and 1F).

Given that ER $\alpha$ -positive tumors tend to develop resistance to tamoxifen treatment and ER $\beta$  associates

with tamoxifen sensitivity of chemotherapy-treated ER $\alpha$ -positive cells, we examined whether ER $\beta$  alters responses of tamoxifen-resistant MCF-7-RR cells to chemotherapy and/or endocrine therapy. We initially observed increased resistance of MCF-7-RR cells to cisplatin treatment compared with wild-type MCF-7 cells, suggesting development of cross-resistance to both endocrine therapy and chemotherapy (Figure 4D). In addition, cisplatin treatment did not restore sensitivity of MCF-7-RR cells to 4-hydroxytamoxifen (Figure 4D) [57]. Given that MCF-7-RR cells express substantially less ER $\beta$  than the tamoxifen-sensitive MCF-7 cells [58] (Figure 4E), we examined whether upregulation of the receptor in the presence of cisplatin restores their sensitivity to tamoxifen. As shown in Figure 4F, induction of ER $\beta$  expression increased the sensitivity of cisplatin-treated MCF-7-RR cells to 4-hydroxytamoxifen.

### ER $\beta$ interacts with wild-type p53

To better understand the molecular mechanism that is employed by ER $\beta$  to regulate wild-type p53 function,

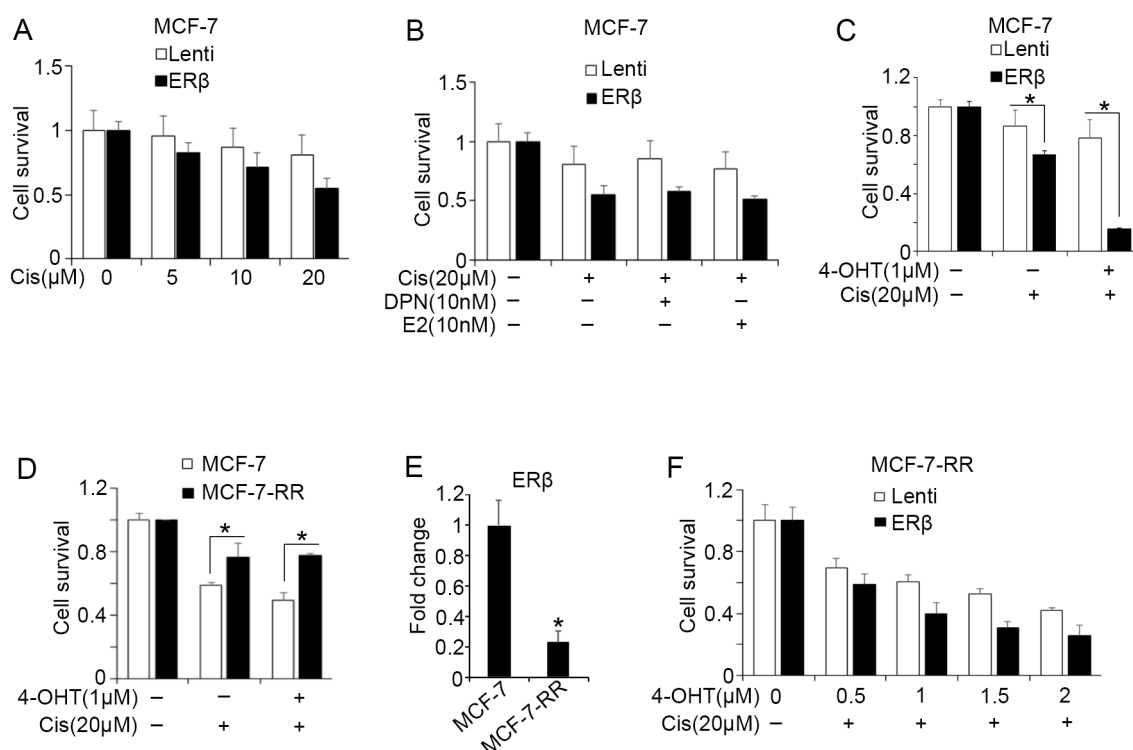

**Figure 4: ER $\beta$  alters the chemosensitivity of breast cancer cells.** Survival of breast cancer cells was analyzed using MTS assay following treatment with the indicated drugs for 72 hours. (A) Survival of control (Lenti) and ER $\beta$ -expressing MCF-7 cells after treatment with the indicated concentrations of cisplatin. (B) Survival of control (Lenti) and ER $\beta$ -expressing MCF-7 cells after treatment with 10 nM DPN or 10 nM estradiol (E2) in the presence of 20  $\mu\text{M}$  cisplatin (Cis). (C) Survival of control (Lenti) and ER $\beta$ -expressing MCF-7 cells after treatment with 1  $\mu\text{M}$  4-OHT alone or in combination with 20  $\mu\text{M}$  cisplatin. (D) Survival of tamoxifen-sensitive (MCF-7) and -resistant (MCF-7-RR) breast cancer cells following treatment with 1  $\mu\text{M}$  4-OHT with or without 20  $\mu\text{M}$  cisplatin. (E) mRNA levels of ER $\beta$  in MCF-7 and MCF-7-RR cells. Values were normalized to MCF-7 cells. (F) Survival of control (Lenti) and ER $\beta$ -expressing MCF-7-RR cells following treatment with increasing concentrations of 4-OHT in the absence and presence of 20  $\mu\text{M}$  cisplatin. Values represent the mean  $\pm$  S.D. of three different experiments.

we examined whether the two proteins interact. We previously showed that ER $\beta$  binds to the intact C-terminus of p53 proteins carrying missense mutations in their DNA-binding domain [7]. The interacting domain of mutant p53 gave us a hint of a potential binding of ER $\beta$  to wild-type p53. To examine whether an association of ER $\beta$  with wild-type p53 occurs in breast cancer cells, we carried out co-immunoprecipitation (CoIP) experiments in wild-type

p53-expressing MCF-7 cells after upregulation of ER $\beta$ . In MCF-7 cells that express low levels of endogenous ER $\beta$ , both the transfected and endogenous receptors were found to interact with p53 (Figure 5A, left). This interaction was also observed in HEK-293 cells (Figure 5A, middle). In addition to CoIP, GST-pull down assay revealed a direct p53-ER $\beta$  binding further supporting the interaction between the two proteins (Figure 5A, right).

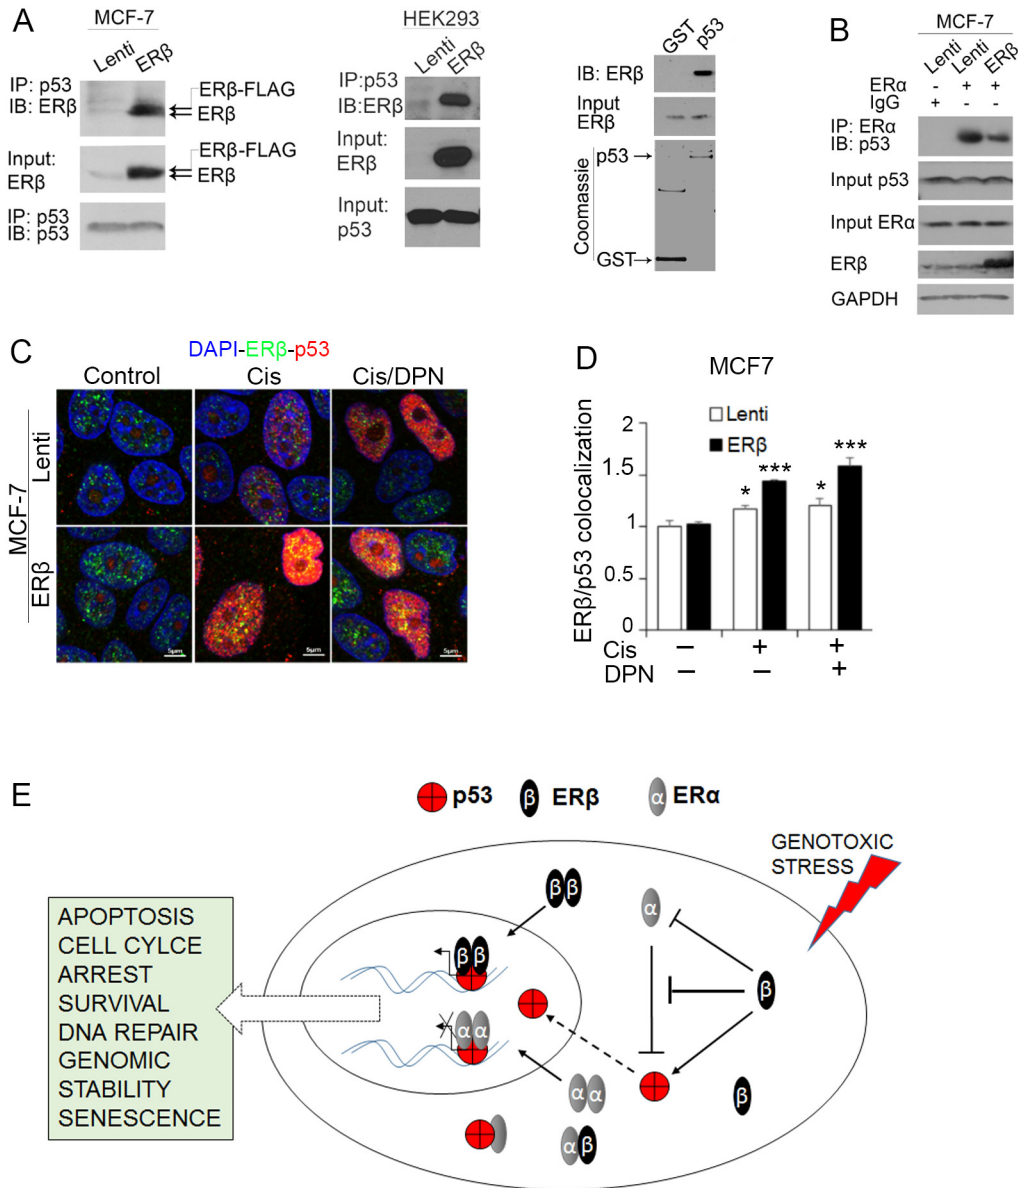

**Figure 5: ER $\beta$  interacts with wild-type p53.** (A) Left: Co-immunoprecipitation of p53 showing ER $\beta$  interaction with p53 in control (Lenti) and ER $\beta$ -expressing (ER $\beta$ ) MCF-7 cells. Middle: Co-immunoprecipitation of p53 showing ER $\beta$  interaction with p53 in control (Lenti) and ER $\beta$ -expressing (ER $\beta$ ) HEK-293T cells. Right: Bacteria-produced GST-tagged p53 (WT p53) proteins were used to pull-down flag-tagged *in vitro* translated ER $\beta$  and all samples were denatured and used for electrophoresis. (B) Co-immunoprecipitation of ER $\alpha$  showing ER $\alpha$  interaction with p53 in control (Lenti) and ER $\beta$ -expressing MCF-7 cells. (C) Immunofluorescence imaging of ER $\beta$  (green) and p53 (red) in control (Lenti) and ER $\beta$ -expressing MCF-7 cells following treatment with 20  $\mu$ M cisplatin alone (Cis) or together with DPN (Cis/DPN) for 24 hours. Nuclei were stained with DAPI (Blue). (D) Quantification of ER $\beta$  and p53 co-localization in control (Lenti) or ER $\beta$ -expressing MCF-7 cells. (E) Scheme representing the synergistic p53 and ER $\beta$  tumor suppressor function in ER $\alpha$ -positive breast cancer cells.



Given that MCF-7 cells express high levels of ER $\alpha$  that binds to and inhibits the activity of p53 [9], we examined whether ER $\beta$  enhances p53 activity in these cells by affecting the interaction of ER $\alpha$  with p53. CoIP experiments showed a substantially lower ER $\alpha$ -p53 association in ER $\beta$ -expressing compared with the control cells (Figure 5B). These results suggest that ER $\beta$  may enhance the tumor suppressor function of p53 in luminal breast cancer cells by preventing the inhibitory effect of ER $\alpha$  on p53.

Nuclear accumulation of p53 is essential for its transcriptional activation in response to DNA damage [59]. To examine whether ER $\beta$  alters p53 subcellular localization, control and ER $\beta$ -expressing MCF-7 cells were exposed to cisplatin alone or cisplatin together with the ER $\beta$  agonist DPN and analyzed by confocal microscopy. Upregulation of ER $\beta$  and/or treatment with DPN enhanced the cisplatin-induced accumulation of p53 in the nucleus of the cells. A co-localization of p53 and ER $\beta$  was also detected under the same conditions (Figure 5C and 5D) that is consistent with the p53 transcriptional activation following the interaction between the two proteins (Figures 1, 2 and 3C). In addition to changes in subcellular localization, induction of ER $\beta$  expression or treatment with DPN caused a remarkable increase in the levels of nuclear p53 (Figure 5C). Taken together, these results suggest that, in addition to acting as co-activator, ER $\beta$  may increase p53 activity by promoting its stability and nuclear translocation. They also indicate the potential of ER $\beta$  ligands to increase chemotherapy sensitivity of luminal breast cancer cells that express wild-type p53.

## DISCUSSION

Collaboration between ER $\beta$  and p53 inactivation has been shown to induce breast tumorigenesis [37]. This led us to hypothesize that ER $\beta$  may synergize with p53 to inhibit breast cancer cell growth and alter response to therapy. Our study identifies ER $\beta$  as a novel activator of wild-type p53-dependent transcription and this function results in decreased survival of luminal breast cancer cells. This mechanism of action may account for the observed association of ER $\beta$  with better prognosis in patients with breast cancer [60, 61]. In addition, we show that, by potentiating the chemotherapy-induced tumor suppressor activity of p53, upregulation of ER $\beta$  or activation with agonists increases the chemosensitivity of luminal breast cancer cells as it was previously shown with TNBC and lung cancer cells [62, 63]. Given that p53 is a master regulator of DNA damage response, by altering the activity of p53, ER $\beta$  seems to regulate signaling that determines the response of cells to chemotherapy-induced DNA damage. This is consistent with previously published data indicating involvement of the receptor in the regulation of DNA damage response pathways [62, 63]. The effect of ER $\beta$  under genotoxic stress may also

explain recent published data that correlate the expression of the receptor in breast tumors with better response to chemotherapy [45]. These associations indicate a potential predictive role of ER $\beta$  in defining patients with functional p53 protein that may benefit from chemotherapy.

Hormonal therapy is the primary option for treating ER $\alpha$ -positive breast cancers. However, a significant proportion of these tumors become resistant to endocrine compounds [41]. Pathways that are overexpressed in anti-estrogen resistant cells are also associated with chemotherapy resistance [58, 64, 65]. In support of these findings, our results suggest that tamoxifen-resistant cells are more resistant to cisplatin, suggesting the development of a cross-resistant cancer cell phenotype. Ligand-independent activation of ER $\alpha$  and aberrant activity of molecular signaling pathways that regulate survival and apoptosis including the p53 pathway are implicated in endocrine resistance of ER $\alpha$ -positive breast tumors [64]. Despite that luminal tumors often maintain wild-type p53 alleles, perturbation of the p53 tumor suppressive function is associated with more aggressive disease status [66]. One of the mechanisms that account for the deregulation of the p53 pathway in these tumors relies on its interaction with ER $\alpha$ . This interaction was shown to inhibit p53-dependent apoptosis in breast cancer cells by impeding the nuclear translocation and transcriptional activity of p53 [36]. The therapeutic potential of this association was demonstrated when ionizing radiation was found to disrupt the ER $\alpha$ -p53 interaction allowing p53 to resume its function [36]. In contrast to ER $\alpha$ , upregulation of ER $\beta$  has been shown to affect the survival of breast cancer cells in a similar manner as wild-type p53 including effects on cell cycle regulators, growth factor receptor and stress response signaling pathways [6, 47, 56]. ER $\beta$  has also been proposed to act on endocrine-resistant phenotypes. Despite the association of the receptor with decreased survival of tamoxifen-resistant cells [58], its role in endocrine resistance is still not well defined. We observed here that in agreement with the decreased expression of ER $\beta$  in tamoxifen-resistant compared with the -sensitive luminal cells, upregulation of ER $\beta$  in endocrine-resistant cells decreases the survival in response to chemotherapy or combined chemotherapy and endocrine therapy. We also investigated the mechanism that is employed by the receptor to elicit these tumor repressive actions. Previous studies have shown that ER $\beta$  forms heterodimers with ER $\alpha$  that result in inhibition of ER $\alpha$ -dependent transcriptional activity [42]. Analysis of DNA binding sites indicated that ER $\beta$  can also bind DNA without ER $\alpha$ -interference in cells that express both receptors [67]. On the other hand, ER $\beta$  was found to interact with mutant p53 in triple-negative breast cancer cells indicating potential involvement of the receptor in the regulation of ER $\alpha$ -wild-type p53 transcriptional complex in luminal phenotypes [7]. Our findings demonstrate that ER $\beta$  interacts with wild-type p53 and attenuates the inhibitory effect of ER $\alpha$  on p53

function in luminal cells. The effect of ER $\beta$  on p53-ER $\alpha$  association may be explained by its direct association with either p53 or ER $\alpha$  and suggests that competition between ER subtypes for cooperation with p53 at the transcriptional level may occur in cells that express both receptors. Thus, the ratio of ER $\beta$  versus ER $\alpha$  and their affinity for p53 binding are crucial factors in determining p53 activity in estrogen responsive tissues. Our results point toward a role of ER $\beta$  as co-regulator that preserves p53 tumor suppressor activity. To achieve this, the receptor can differently act on wild-type and mutant p53 due to their formation of distinct transcriptional complexes. Only mutant p53 interacts with p63 and p73 and because of its impaired DNA binding activity, it often tethers to specific DNA sequences through other transcription factors. By binding to anti-metastatic p63 and preventing its normal transcriptional activity, mutant p53 promotes cell invasion [68, 69]. Our findings suggest that ER $\beta$  binds to both wild-type and mutant p53 [7]. In highly metastatic TNBC cells, the interaction of ER $\beta$  with mutant p53-p63 complexes attenuates the inhibitory effect of mutant p53 on p63 allowing p63 transcriptional activation that decreases invasion [7]. In luminal cells, ER $\beta$  acts on wild-type p53-ER $\alpha$  complex and increases the expression of the direct p53 target anti-proliferative and pro-apoptotic genes. In addition to TNBC cells, ER $\beta$  is highly likely to interact with mutant p53 in luminal tumor cells. This interaction may also depend on ER $\alpha$  and reverse gain-of-function activities of mutant p53 similarly with the repression of mutant p53 in ER $\beta$ -expressing TNBC cells [7]. Previous studies have shown that ER $\beta$  inhibits the growth both *in vitro* and *in vivo* of luminal T47D cells that express mutant p53 [70]. Consistent with these studies, our results show that ER $\beta$  increases the expression of the anti-proliferative p53 target genes suggesting that ER $\beta$  may restore the wild-type function of mutant p53. Our findings shed light onto the mechanism of p53 regulation in breast cancer. Delineating the effects of ER subtypes on p53 activity may advance methods of predicting therapy responses given that the ER $\beta$ /ER $\alpha$  ratio was previously proposed to function as a determinant of clinical outcome.

## MATERIALS AND METHODS

### Cell culture and reagents

ER $\alpha$ -positive and wild-type p53 breast cancer MCF-7 and ZR-75-1 cells lines and ER $\alpha$ -negative breast epithelial cell line MCF-10A were obtained from ATCC (Manassas, VA, USA). MCF-7 and ZR-75-1 cells were cultured in Dulbecco's Modified Eagle Medium (DMEM) supplemented with 10% fetal bovine serum (FBS). MCF-10A cells were cultured in DMEM/Nutrient Mixture F-12 media supplemented with 10% FBS, insulin and epidermal growth factor (EGF). The ER $\alpha$ -positive, estrogen-independent and tamoxifen-

resistant MCF-7 cells (MCF-7-RR) were obtained from Dr. R. Clarke (Georgetown University) [71]. MCF-7-RR cells were maintained in phenol red-free Iscove's modified Eagle medium media (Invitrogen, Carlsbad, CA, USA) supplemented with 5% dextran-coated charcoal-stripped (DCC) FBS and 4-hydroxytamoxifen (Sigma-Aldrich, St Louis, MO, USA). The ER $\alpha$ -positive and p53 mutant T47D cell line was obtained from ATCC and cultured in Roswell Park Memorial Institute medium (RPMI1640) supplemented with 10% FBS. Stable cell lines were generated using pLenti6/V5 empty vector and pLenti6/V5-ER $\beta$ -Flag recombinant plasmid as previously described [72]. Empty pIRES vector and pIRES-ER $\beta$  plasmid were used for transient transfection. Previously validated siRNAs targeting ER $\beta$  (1# 5'-TTACGACATTAAGTAGTGTCTGCC-3' and 2# 5'-TATTGACCGCTACCTGGTGATTCC-3') were purchased from Invitrogen and doubly transfected to enhance ER $\beta$  downregulation [58]. An siRNA against luciferase was used as a control (Cat. No. 12935-146, Invitrogen).

### Ligand and drug treatments

To assess ER activity, breast cancer cells were maintained in 1% DCC-FBS media for 48 hours prior to treatment for 24 hours with 17 $\beta$ -estradiol (E2), diarylpropionitrile (DPN), fulvestrant (ICI182780 or ICI) or 4-hydroxytamoxifen (4-OHT). To induce genotoxic stress, cisplatin was freshly dissolved in DMSO and used at concentrations of 10  $\mu$ M or 20  $\mu$ M. Cells were incubated in the presence or absence of cisplatin and the ER subtype-specific ligands for 24 hours.

### RNA extraction and real-time reverse transcription (RT)-PCR

Cells were seeded in 6-well plates and total RNA was extracted using the Aurum Total RNA Mini Kit (Biorad). Copy DNA was generated from purified mRNA using the iScript cDNA Synthesis Kit (Biorad) and real-time PCR was conducted using the VeriQuest Fast SYBR Green qPCR Master Mix (Affymetrix). All primers used in real-time PCR are listed in Supplementary Table 2.

### Immunofluorescence analysis

Cells were maintained on coverslips for 48 hours in 1% DCC media followed by treatment for 24 hours with vehicle, cisplatin or cisplatin and DPN. Cells were then fixed with 3.7% paraformaldehyde (PFA) in PBS, permeabilized with 0.3% Triton X-100 in PBS, and blocked with 2% bovine serum albumin (BSA). Samples were incubated with anti-p53 (DO1-Santa Cruz) and anti-ER $\beta$  (14C8, Genetex) overnight at 4°C and probed with the secondary antibodies for 1 hour at room temperature.

Coverslips were mounted with Vectashield medium containing DAPI for nucleus detection. Fluorescent images were acquired using an Olympus FV1200 inverted confocal microscope and the ER $\beta$ -p53 co-localization was analyzed using Pearson's correlation coefficient of 10 frames (123.993  $\mu$ m X 123.993  $\mu$ m) per sample with an Olympus FV10 Software.

### Co-immunoprecipitation and immunoblotting

All co-immunoprecipitation, pull-down and immunoblotting assays were performed as previously described [7]. Briefly, GST-tagged proteins were produced in bacteria (Rosetta) and solubilized by sonication combined to a freeze and thaw cycle. Glutathione sepharose beads were used for protein purification, followed by *in vitro*-translated protein immunoprecipitation. Proteins were immunoblotted after electrophoresis using specific antibodies. p53 was detected with DO1 antibody, ER $\beta$  with 14C8, the polyclonal 51-7700 (Invitrogen) or anti-FLAG (Cell signaling) antibodies. For the GST pull-down experiment, whole bacterial lysate was stained with SimplyBlue SafeStain (ThermoFisher) to detect protein expression.

### Survival assay

Cells were maintained in 1% DCC media for 48 hours in 96-well plates. Cells were exposed to specific treatments for 72 hours and survival was measured using a colorimetric CellTiter 96® Aqueous One Solution Cell Proliferation MTS Assay as recommended by the manufacturer (Promega, US). The absorbance was measured using a plate reader at 490 nm.

### Analysis of clinical data

DNA sequencing datasets of chromatin immunoprecipitated ER $\beta$  and p53 (GSE42348 and GSE47041, respectively) were downloaded from Gene Expression Omnibus (GEO/NCBI). As previously described [73, 74], ER $\beta$  was expressed at similar level to endogenous ER $\alpha$  in MCF-7 cells (GSM1038224) or in ER $\alpha$ -knockdown MCF-7 cells (GSM1038225). Protein enrichment was analyzed using MACS (Model-based Analysis of ChIP-Seq) and common target genes were identified. Survival analysis was performed using Kaplan-Meier Plotter [53].

### Statistical analysis

Student's t test, ANOVA and Pearson correlation coefficient were used for statistical analysis. P-value <0.05 was considered significant.

## ACKNOWLEDGMENTS

This work was supported by the Robert A. Welch Foundation (E-0004), Swedish Cancer Fund, Department of Defense (68847-MA-REP/W911NF-16-1-0480) and organized and creative scholarly activity grant from university of Houston-Downtown.

## CONFLICTS OF INTEREST

The authors declare that they have no competing interest.

## REFERENCES

1. Anderson WF, Katki HA, Rosenberg PS. Incidence of breast cancer in the United States: current and future trends. *J Natl Cancer Inst.* 2011; 103:1397–402. <https://doi.org/10.1093/jnci/djr257>.
2. Tamoxifen for early breast cancer: an overview of the randomised trials. Early Breast Cancer Trialists' Collaborative Group. *Lancet.* 1998; 351:1451–67. [https://doi.org/10.1016/S0140-6736\(97\)11423-4](https://doi.org/10.1016/S0140-6736(97)11423-4).
3. Thomas C, Gustafsson JÅ. The different roles of ER subtypes in cancer biology and therapy. *Nat Rev Cancer.* 2011; 11:597–608. <https://doi.org/10.1038/nrc3093>.
4. Early Breast Cancer Trialists' Collaborative Group (EBCTCG). Effects of chemotherapy and hormonal therapy for early breast cancer on recurrence and 15-year survival: an overview of the randomised trials. *Lancet.* 2005; 365:1687–717. [https://doi.org/10.1016/S0140-6736\(05\)66544-0](https://doi.org/10.1016/S0140-6736(05)66544-0).
5. Thomas C, Gustafsson JA. A CUE hints at tumor resistance. *Nat Med.* 2011; 17:658–60. <https://doi.org/10.1038/nm0611-658>.
6. Carroll JS, Meyer CA, Song J, Li W, Geistlinger TR, Eeckhoute J, Brodsky AS, Keeton EK, Fertuck KC, Hall GF, Wang Q, Bekiranov S, Sementchenko V, et al. Genome-wide analysis of estrogen receptor binding sites. *Nat Genet.* 2006; 38:1289–97. <https://doi.org/10.1038/ng1901>.
7. Bado I, Nikolos F, Rajapaksa G, Gustafsson JÅ, Thomas C. ER $\beta$  decreases the invasiveness of triple-negative breast cancer cells by regulating mutant p53 oncogenic function. *Oncotarget.* 2016; 7:19–21. <https://doi.org/10.18632/oncotarget.7300>.
8. Silwal-Pandit L, Vollan HK, Chin SF, Rueda OM, McKinney S, Osako T, Quigley DA, Kristensen VN, Aparicio S, Børresen-Dale AL, Caldas C, Langerød A. TP53 mutation spectrum in breast cancer is subtype specific and has distinct prognostic relevance. *Clin Cancer Res.* 2014; 20:3569–80. <https://doi.org/10.1158/1078-0432.CCR-13-2943>.

9. Coates AS, Millar EK, O'Toole SA, Molloy TJ, Viale G, Goldhirsch A, Regan MM, Gelber RD, Sun Z, Castiglione-Gertsch M, Gusterson B, Musgrove EA, Sutherland RL. Prognostic interaction between expression of p53 and estrogen receptor in patients with node-negative breast cancer: results from IBCSG Trials VIII and IX. *Breast Cancer Res.* 2012; 14:R143. <https://doi.org/10.1186/bcr3348>.
10. Shetty S, Shetty P, Idell S, Velusamy T, Bhandary YP, Shetty RS. Regulation of plasminogen activator inhibitor-1 expression by tumor suppressor protein p53. *J Biol Chem.* 2008; 283:19570–80. <https://doi.org/10.1074/jbc.M710268200>.
11. Basu A, Krishnamurthy S. Cellular responses to cisplatin-induced DNA damage. *J Nucleic Acids.* 2010; 2010:1–16. <https://doi.org/10.4061/2010/201367>.
12. Bissonnette N, Hunting DJ. p21-induced cycle arrest in G1 protects cells from apoptosis induced by UV-irradiation or RNA polymerase II blockage. *Oncogene.* 1998; 16:3461–9. <https://doi.org/10.1038/sj.onc.1201899>.
13. Farnebo M, Bykov VJ, Wiman KG. The p53 tumor suppressor: a master regulator of diverse cellular processes and therapeutic target in cancer. *Biochem Biophys Res Comm.* 2010; 396:85–9. <https://doi.org/10.1016/j.bbrc.2010.02.152>.
14. Deng C, Zhang P, Harper WJ, Elledge SJ, Leder P. Mice lacking p21CIP1/WAF1 undergo normal development, but are defective in G1 checkpoint control. *Cell.* 1995; 82:675–84. [https://doi.org/10.1016/0092-8674\(95\)90039-X](https://doi.org/10.1016/0092-8674(95)90039-X).
15. Yu J, Zhang L. PUMA, a potent killer with or without p53. *Oncogene.* 2008; 27:S71–83. <https://doi.org/10.1038/nc.2009.45>.
16. Jin S, Mazzacurati L, Zhu X, Tong T, Song Y, Shujuan S, Petrik KL, Rajasekaran B, Wu M, Zhan Q. Gadd45a contributes to p53 stabilization in response to {DNA} damage. *Oncogene.* 2003; 22:8536–40. <https://doi.org/10.1038/sj.onc.1206907>.
17. Huarte M. p53 partners with RNA in the DNA damage response. *Nat Genet.* 2016; 48:1298–9. <https://doi.org/10.1038/ng.3702>.
18. Zhan Q. Gadd45a, a p53- and BRCA1-regulated stress protein, in cellular response to DNA damage. *Mut Res.* 2005; 569:133–43. <https://doi.org/10.1016/j.mrfmmm.2004.06.055>.
19. Rosemary Siafakas A, Richardson DR. Growth arrest and DNA damage-45 alpha (GADD45alpha). *Int J Biochem Cell Biol.* 2009; 81:986–9. <https://doi.org/10.1016/j.biocel.2008.06.018>.
20. Kortlever RM, Higgins PJ, Bernards R. Plasminogen activator inhibitor-1 is a critical downstream target of p53 in the induction of replicative senescence. *Nat Cell Biol.* 2006; 8:877–84. <https://doi.org/10.1038/ncb1448>.
21. Brooks CL, Gu W. p53 ubiquitination: Mdm2 and beyond. *Mol Cell.* 2006; 21:307–15. <https://doi.org/10.1016/j.molcel.2006.01.020>.
22. Kruse JP, Gu W. Modes of p53 regulation. *Cell.* 2009; 137:609–22. <https://doi.org/10.1016/j.cell.2009.04.050>.
23. Haupt Y, Maya R, Kazaz A, Oren M. Mdm2 promotes the rapid degradation of p53. *Nature.* 1997; 387:296–9. <https://doi.org/10.1038/387296a0>.
24. Turbin DA, Cheang MC, Bajdik CD, Gelmon KA, Yorida E, De Luca A, Nielsen TO, Huntsman DG, Gilks CB. MDM2 protein expression is a negative prognostic marker in breast carcinoma. *Mod Pathol.* 2006; 193800484:69–74. <https://doi.org/10.1038/modpathol.3800484>.
25. Lee JT, Gu W. The multiple levels of regulation by p53 ubiquitination. *Cell Death Differ.* 2010; 17:86–92. <https://doi.org/10.1038/cdd.2009.77>.
26. Mukherjee S, Conrad SE. C-Myc suppresses p21WAF1/CIP1 expression during estrogen signaling and antiestrogen resistance in human breast cancer cells. *J Biol Chem.* 2005; 280:17617–25. <https://doi.org/10.1074/jbc.M502278200>.
27. Konduri SD, Medisetty R, Liu W, Kaiparettu BA, Srivastava P, Brauch H, Fritz P, Swetzig WM, Gardner AE, Khan SA, Das GM. Mechanisms of estrogen receptor antagonism toward p53 and its implications in breast cancer therapeutic response and stem cell regulation. *Proc Natl Acad Sci U S A.* 2010; 107:15081–6. <https://doi.org/10.1073/pnas.1009575107>.
28. Williams MM, Cook RS. Bcl-2 family proteins in breast development and cancer: could Mcl-1 targeting overcome therapeutic resistance? *Oncotarget.* 2015; 6:3519–30. <https://doi.org/10.18632/oncotarget.2792>.
29. Rhodes DR, Yu J, Shanker K, Deshpande N, Varambally R, Ghosh D, Barrette T, Pander A, Chinnaiyan AM. ONCOMINE: a cancer microarray database and integrated data-mining platform. *Neoplasia.* 2004; 6:1–6. [https://doi.org/10.1016/S1476-5586\(04\)80047-2](https://doi.org/10.1016/S1476-5586(04)80047-2).
30. Shai A, Pitot HC, Lambert PF. p53 loss synergizes with estrogen and papillomaviral oncogenes to induce cervical and breast cancers. *Cancer Res.* 2008; 68:2622–31. <https://doi.org/10.1158/0008-5472.CAN-07-5266>.
31. Berger CE, Qian Y, Liu G, Chen H, Chen X. p53, a target of estrogen receptor (ER)  $\alpha$ , modulates DNA damage-induced growth suppression in ER-positive breast cancer cells. *J Biol Chem.* 2012; 287:30117–27. <https://doi.org/10.1074/jbc.M112.367326>.
32. Bailey ST, Shin H, Westerling T, Liu XS, Brown M. Estrogen receptor prevents p53-dependent apoptosis in breast cancer. *Proc Natl Acad Sci U S A.* 2012; 109:18060–5. <https://doi.org/10.1073/pnas.1018858109>.
33. Liu G, Schwartz JA, Brooks SC. p53 down-regulates ER-responsive genes by interfering with the binding of ER to ERE. *Biochem Biophys Res Commun.* 1999; 264:359–64. <https://doi.org/10.1006/bbrc.1999.1525>.
34. Yu CL, Driggers P, Barrera-Hernandez G, Nunez SB, Segars JH, Cheng S. The tumor suppressor p53 is a negative regulator of estrogen receptor signaling pathways. *Biochem Biophys Res Commun.* 1997; 239:617–20.

35. Sayeed A, Konduri SD, Liu W, Bansal S, Li F, Das GM. Estrogen receptor alpha inhibits p53-mediated transcriptional repression: implications for the regulation of apoptosis. *Cancer Res.* 2007; 67:7746–55. <https://doi.org/10.1158/0008-5472.CAN-06-3724>.
36. Liu W, Ip MM, Podgorsak MB, Das GM. Disruption of estrogen receptor alpha-p53 interaction in breast tumors: a novel mechanism underlying the anti-tumor effect of radiation therapy. *Breast Cancer Res Treat.* 2009; 115:43–50. <https://doi.org/10.1007/s10549-008-0044-z>.
37. Bado I, Nikolos F, Rajapaksa G, Wu W, Castaneda J, Krishnamurthy S, Webb P, Gustafsson JÅ, Thomas C. Somatic loss of estrogen receptor beta and p53 synergize to induce breast tumorigenesis. *Breast Cancer Res.* 2017; 19:79. <https://doi.org/10.1186/s13058-017-0872-z>.
38. Shaaban AM, O'Neill PA, Davies MP, Sibson R, West CR, Smith PH, Foster CS. Declining estrogen receptor-beta expression defines malignant progression of human breast neoplasia. *Am J Surg Pathol.* 2003; 27:1502–12.
39. Vivar OI, Zhao X, Saunier EF, Griffin C, Mayba OS, Tagliaferri M, Cohen I, Speed TP, Leitman DC. Estrogen receptor  $\beta$  binds to and regulates three distinct classes of target genes. *J Biol Chem.* 2010; 285:22059–66. <https://doi.org/10.1074/jbc.M110.114116>.
40. Grober OM, Mutarelli M, Giurato G, Ravo M, Cicatiello L, De Filippo MR, Ferraro L, Nassa G, Papa MF, Paris O, Tarallo R, Luo S, Schroth GP, et al. Global analysis of estrogen receptor beta binding to breast cancer cell genome reveals an extensive interplay with estrogen receptor alpha for target gene regulation. *BMC Genomics.* 2011; 12:1–16. <https://doi.org/10.1186/1471-2164-12-36>.
41. Klinge CM, Jernigan SC, Mattingly KA, Risinger KE, Zhang J. Estrogen response element-dependent regulation of transcriptional activation of estrogen receptors alpha and beta by coactivators and corepressors. *J Mol Endocrinol.* 2004; 33:387–410. <https://doi.org/10.1677/jme.1.01541>.
42. Cowley SM, Hoare S, Mosselman S, Parker MG. Estrogen receptors alpha and beta form heterodimers on DNA. *J Biol Chem.* 1997; 272:19858–62. <https://doi.org/10.1074/jbc.272.32.19858>.
43. Hartman J, Lindberg K, Morani A, Inzunza J, Ström A, Gustafsson JA. Estrogen receptor beta inhibits angiogenesis and growth of T47D breast cancer xenografts. *Cancer Res.* 2006; 66:11207–13. <https://doi.org/10.1158/0008-5472.CAN-06-0017>.
44. Treeck O, Lattrich C, Springwald A, Ortmann O. Estrogen receptor beta exerts growth-inhibitory effects on human mammary epithelial cells. *Breast Cancer Res Treat.* 2010; 120:557–65. <https://doi.org/10.1007/s10549-009-0413-2>.
45. Elebro K, Borgquist S, Rosendahl AH, Markkula A, Simonsson M, Jirström K, Rose C, Ingvar C, Jernström H. High estrogen receptor  $\beta$  expression is prognostic among adjuvant chemotherapy-treated patients - results from a population-based breast cancer cohort. *Clin Cancer Res.* 2017; 23. <https://doi.org/10.1158/1078-0432.CCR-16-1095>.
46. Tan W, Li Q, Chen K, Su F, Song E, Gong C. Estrogen receptor beta as a prognostic factor in breast cancer patients: a systematic review and meta-analysis. *Oncotarget.* 2016; 7:10373–85. <https://doi.org/10.18632/oncotarget.7219>.
47. Nakopoulou L, Lazaris AC, Panayotopoulou EG, Giannopoulou I, Givalos N, Markaki S, Keramopoulos A. The favourable prognostic value of oestrogen receptor beta immunohistochemical expression in breast cancer. *J Clin Pathol.* 2004; 57:523–8.
48. Thomas C, Rajapaksa G, Nikolos F, Hao R, Katchy A, McCollum CW, Bondesson M, Quinlan P, Thompson A, Krishnamurthy S, Esteva FJ, Gustafsson JÅ. ER $\beta$ 1 represses basal-like breast cancer epithelial to mesenchymal transition by destabilizing EGFR. *Breast Cancer Res.* 2012; 14:R148. <https://doi.org/10.1186/bcr3358>.
49. Zamble DB, Jacks T, Lippard SJ. p53-dependent and -independent responses to cisplatin in mouse testicular teratocarcinoma cells. *Proc Natl Acad Sci U S A.* 1998; 95:6163–8. <https://doi.org/10.1073/pnas.95.11.6163>.
50. Chipuk JE, Kuwana T, Bouchier-Hayes L, Droin NM, Newmeyer DD, Schuler M, Green DR. Direct activation of Bax by p53 mediates mitochondrial membrane permeabilization and apoptosis. *Science.* 2004; 303:1010–4. <https://doi.org/10.1126/science.1092734>.
51. Hiraki M, Hwang SY, Cao S, Ramadhar TR, Byun S, Yoon KW, Lee JH, Chu K, Gurkar AU, Kolev V, Zhang J, Namba T, Murphy ME, et al. Small-molecule reactivation of mutant p53 to wild-type-like p53 through the p53-Hsp40 regulatory axis. *Chem Biol.* 2015; 22:1206–16. <https://doi.org/10.1016/j.chembiol.2015.07.016>.
52. Sinha S, Malonia SK, Mittal SP, Singh K, Kadreppa S, Kamat R, Mukhopadhyaya R, Pal JK, Chattopadhyay S. Coordinated regulation of p53 apoptotic targets BAX and PUMA by SMAR1 through an identical MAR element. *EMBO J.* 2010; 29:830–42. <https://doi.org/10.1038/emboj.2009.395>.
53. Györfy B, Lanczky A, Eklund AC, Denkert C, Budczies J, Li Q, Szallasi Z. An online survival analysis tool to rapidly assess the effect of 22,277 genes on breast cancer prognosis using microarray data of 1,809 patients. *Breast Cancer Res Treat.* 2010; 123:725–31. <https://doi.org/10.1007/s10549-009-0674-9>.
54. Barkhem T, Carlsson B, Nilsson Y, Enmark E, Gustafsson J, Nilsson S. Differential response of estrogen receptor alpha and estrogen receptor beta to partial estrogen agonists/antagonists. *Mol Pharmacol.* 1998; 54:105–12. <https://doi.org/10.1124/mol.54.1.105>.
55. Nakajima Y, Akaogi K, Suzuki T, Osakabe A, Yamaguchi C, Sunahara N, Ishida J, Kako K, Ogawa S, Fujimura T, Homma Y, Fukamizu A, Murayama A, et al. Estrogen regulates tumor growth through a nonclassical pathway that includes the transcription factors ER and KLF5. *Sci Signal.* 2011; 4:ra22-ra22. <https://doi.org/10.1126/scisignal.2001551>.

56. Leung YK, Gao Y, Lau KM, Zhang X, Ho SM. ICI 182,780-regulated gene expression in DU145 prostate cancer cells is mediated by estrogen receptor-beta/NFkappaB crosstalk. *Neoplasia*. 2006; 8:242–9. <https://doi.org/10.1593/neo.05853>.
57. Nehra R, Riggins RB, Shajahan AN, Zwart A, Crawford AC, Clarke R. BCL2 and CASP8 regulation by NF-kappaB differentially affect mitochondrial function and cell fate in antiestrogen-sensitive and -resistant breast cancer cells. *FASEB J*. 2010; 24:2040–55. <https://doi.org/10.1096/fj.09-138305>.
58. Rajapaksa G, Nikolos F, Bado I, Clarke R, Gustafsson JÅ, Thomas C. ERβ decreases breast cancer cell survival by regulating the IRE1/XBP-1 pathway. *Oncogene*. 2014; 34:1–12. <https://doi.org/10.1038/onc.2014.343>.
59. Lakin ND, Jackson SP. Regulation of p53 in response to DNA damage. *Oncogene*. 1999; 18:7644–55. <https://doi.org/10.1038/sj.onc.1203015>.
60. Honma N, Horii R, Iwase T, Saji S, Younes M, Takubo K, Matsuura M, Ito Y, Akiyama F, Sakamoto G. Clinical importance of estrogen receptor-beta evaluation in breast cancer patients treated with adjuvant tamoxifen therapy. *J Clin Oncol*. 2008; 26:3727–34. <https://doi.org/10.1200/JCO.2007.14.2968>.
61. Shaaban AM, Green AR, Karthik S, Alizadeh Y, Hughes TA, Harkins L, Ellis IO, Robertson JF, Paish EC, Saunders PT, Groome NP, Speirs V. Nuclear and cytoplasmic expression of ERB1, ERB2, and ERB5 identifies distinct prognostic outcome for breast cancer patients. *Clin Cancer Res*. 2008; 14:5228–35. <https://doi.org/10.1158/1078-0432.CCR-07-4528>.
62. Thomas CG, Strom A, Lindberg K, Gustafsson JA. Estrogen receptor beta decreases survival of p53-defective cancer cells after DNA damage by impairing G2/M checkpoint signaling. *Breast Cancer Res Treat*. 2011; 127:417–27. <https://doi.org/10.1007/s10549-010-1011-z>.
63. Nikolos F, Thomas C, Bado I, Gustafsson JÅ. ERβ sensitizes NSCLC to chemotherapy by regulating DNA damage response. *Mol Cancer Res*. 2018; 16:233–42. <https://doi.org/10.1158/1541-7786.MCR-17-0201>.
64. Clarke R, Cook KL. Unfolding the role of stress response signaling in endocrine resistant breast cancers. *Front Oncol*. 2015; 5:140. <https://doi.org/10.3389/fonc.2015.00140>.
65. Chen X, Iliopoulos D, Zhang Q, Tang Q, Greenblatt MB, Hatzia Apostolou M, Lim E, Tam WL, Ni M, Chen Y, Mai J, Shen H, Hu DZ, et al. XBP1 promotes triple-negative breast cancer by controlling the HIF1α pathway. *Nature*. 2014; 508:103–7. <https://doi.org/10.1038/nature13119>.
66. Dumay A, Feugeas JP, Wittmer E, Lehmann-Che J, Bertheau P, Espié M, Plassa LF, Cottu P, Marty M, André F, Sotiriou C, Pusztai L, De Thé H. Distinct tumor protein p53 mutants in breast cancer subgroups. *Int J Cancer*. 2013; 132:1227–31. <https://doi.org/10.1002/ijc.27767>.
67. Charn TH, Liu ET, Chang EC, Lee YK, Katzenellenbogen JA, Katzenellenbogen BS. Genome-wide dynamics of chromatin binding of estrogen receptors α and β: mutual restriction and competitive site selection. *Mol Endocrinol*. 2010; 24:47–59. <https://doi.org/10.1210/me.2009-0252>.
68. Muller PA, Caswell PT, Doyle B, Iwanicki MP, Tan EH, Karim S, Lukashchuk N, Gillespie DA, Ludwig RL, Gosselin P, Cromer A, Brugge JS, Sansom OJ, et al. Mutant p53 drives invasion by promoting integrin recycling. *Cell*. 2009; 139:1327–41. <https://doi.org/10.1016/j.cell.2009.11.026>.
69. Muller PA, Vousden KH. P53 Mutations in Cancer. *Nat Cell Biol*. 2013; 15:2–8. <https://doi.org/10.1038/ncb2641>.
70. Ström A, Hartman J, Foster JS, Kietz S, Wimalasena J, Gustafsson JÅ. Estrogen receptor β inhibits 17β-estradiol-stimulated proliferation of the breast cancer cell line T47D. *Proc Natl Acad Sci U S A*. 2004; 101:1566–71. <https://doi.org/10.1073/pnas.0308319100>.
71. Cook KL, Shajahan AN, Wärrri A, Jin L, Hilakivi-Clarke LA, Clarke R. Glucose-regulated protein 78 controls cross-talk between apoptosis and autophagy to determine antiestrogen responsiveness. *Cancer Res*. 2012; 72:3337–49. <https://doi.org/10.1158/0008-5472.CAN-12-0269>.
72. Hartman J, Edvardsson K, Lindberg K, Zhao C, Williams C, Ström A, Gustafsson JÅ. Tumor repressive functions of estrogen receptor β in SW480 colon cancer cells. *Cancer Res*. 2009; 69:6100–6. <https://doi.org/10.1158/0008-5472.CAN-09-0506>.
73. Madak-Erdogan Z, Charn TH, Jiang Y, Liu ET, Katzenellenbogen JA, Katzenellenbogen BS. Integrative genomics of gene and metabolic regulation by estrogen receptors α and β, and their coregulators. *Mol Syst Biol*. 2013; 9:676. <https://doi.org/10.1038/msb.2013.28>.
74. Janky R, Verfaillie A, Imrichová H, van de Sande B, Standaert L, Christiaens V, Hulselmans G, Herten K, Naval Sanchez M, Potier D, Svetlichnyy D, Kalender Atak Z, Fiers M, et al. iRegulon: from a gene list to a gene regulatory network using large motif and track collections. *PLoS Comput Biol*. 2014; 10. <https://doi.org/10.1371/journal.pcbi.1003731>.
