# Supplementary material for: ERβ alters the chemosensitivity of luminal breast cancer cells by regulating p53 function
Source: PubMed Central journal article supplement (PMC5976481; doi:10.18632/oncotarget.25147), 2018-04-27
Supplement: oncotarget-09-22509-s001.pdf [file oncotarget-09-22509-s001.pdf]

## ER $\beta$ alters the chemosensitivity of luminal breast cancer cells by regulating p53 function

### SUPPLEMENTARY MATERIALS

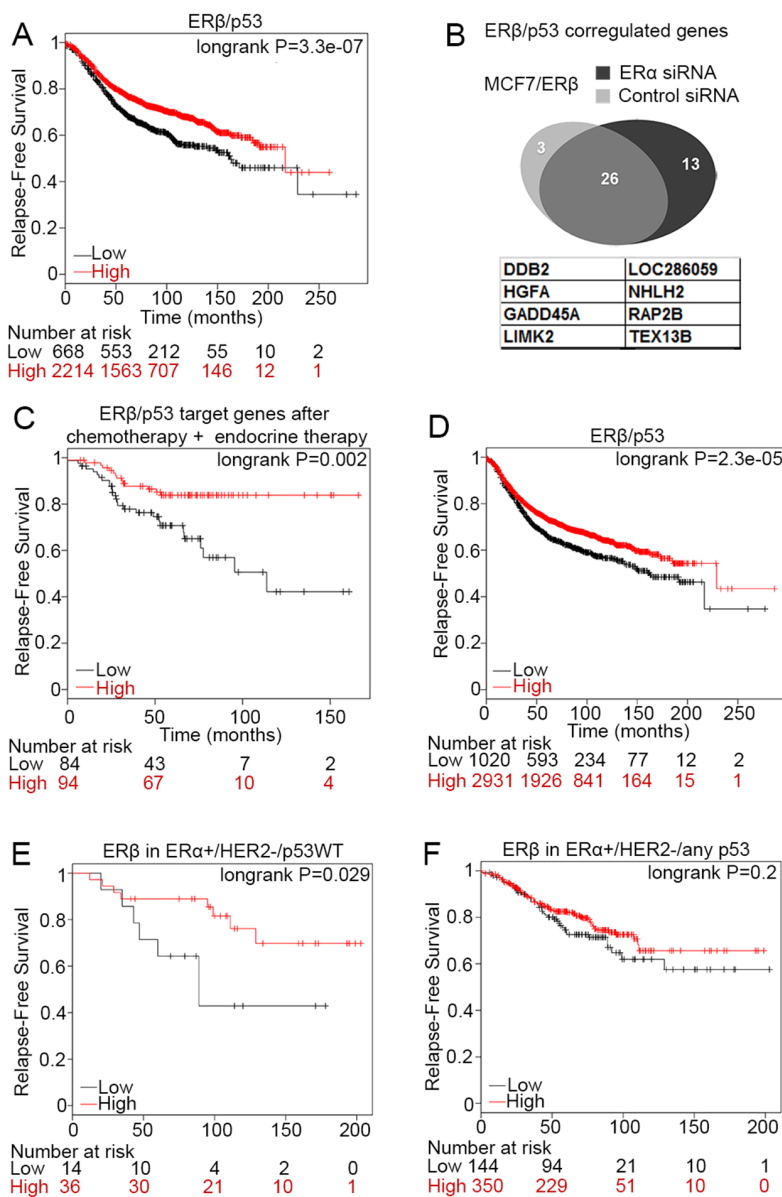

**Supplementary Figure 1: ER $\beta$  and p53 signature correlates with better prognosis.** (A) Correlation of dual ER $\beta$  and p53 mRNA expression with survival in ER $\alpha$ -positive breast cancer patients using KM plotter survival platform. (B) Venn Diagram from ChIP-seq analysis of ER $\beta$  and p53 common target genes (top). ER $\beta$  and p53 co-regulated genes with positive clinical correlation (bottom). Publicly available data were obtained for GEO/NCBI database. (C) KM plot showing association of mRNA expression of ER $\beta$ /p53 common target genes (GADD45A, PUMA, p21, PAI-1) with survival in ER $\alpha$ -positive breast cancer patients following endocrine therapy and chemotherapy. (D) KM plot showing correlation of dual ER $\beta$  and p53 mRNA expression with survival in breast cancers that were treated with endocrine therapy. (E, F) KM plots showing association of ER $\beta$  mRNA expression with survival in ER $\alpha$ -positive/HER2-negative breast cancers that have either wild-type p53 (E) or any p53 (F) status.

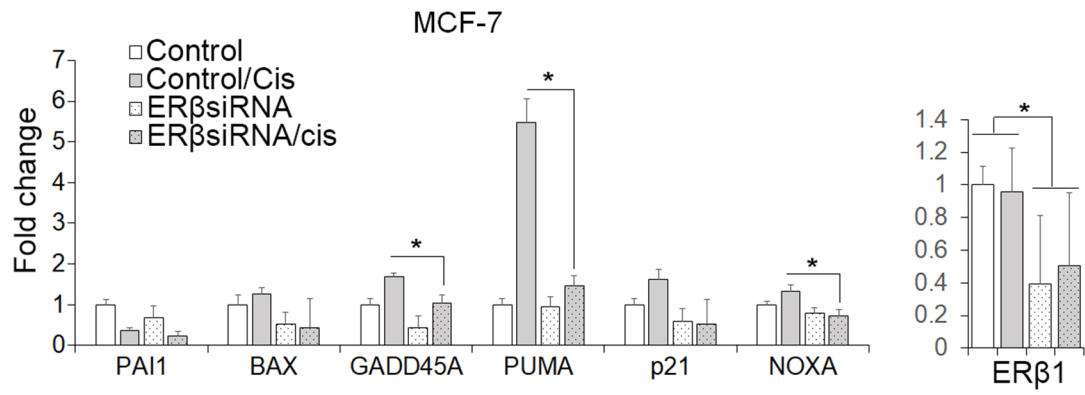

**Supplementary Figure 2: Downregulation of ERβ alters p53-dependent transcription in response to chemotherapy.** mRNA expression of p53 target genes in MCF-7 cells following transfection with control (Control) or siRNA#2 against ERβ and treatment with vehicle or 20 μM cisplatin for 24 hours. Values were normalized to the untreated control cells.

**Supplementary Table 1: Genes bound to both ER $\beta$  and p53 in MCF-7 cells**

| <b>ER<math>\beta</math>-expressing MCF-7 cells</b> |                                    | <b>ER<math>\beta</math>-expressing MCF-7 cells</b> |                                    |
|----------------------------------------------------|------------------------------------|----------------------------------------------------|------------------------------------|
| <b>Control</b>                                     | <b>ER<math>\alpha</math> siRNA</b> | <b>Control</b>                                     | <b>ER<math>\alpha</math> siRNA</b> |
| LOC101928973                                       | LOC101928973                       | REV3L                                              | <b>GADD45A</b>                     |
| C9orf69                                            | C9orf69                            | NEURL1B                                            | LOC286059                          |
| SPTSSA                                             | DDB2                               | ACTG1                                              | DAPL1                              |
| MDM2                                               | ACTB                               | STC2                                               | NEAT1                              |
| TRIAP1                                             | SPTSSA                             | C17orf82                                           | LOC101928855                       |
| FGD3                                               | MDM2                               | SLC25A5-AS1                                        | REV3L                              |
| ACTB                                               | FGD3                               | PNPLA7                                             | ACTG1                              |
| PPP4R3A                                            | RRM2B                              | SULF1                                              | LIMK2                              |
| 9-Sept                                             | HGFAC                              | KRT18                                              | NEURL1B                            |
| PTGFRN                                             | PPP4R3A                            |                                                    | APPBP2                             |
| UNQ6494                                            | FAM72C                             |                                                    | STC2                               |
| PPM1D                                              | 9-Sept                             |                                                    | C17orf82                           |
| MAD1L1                                             | RAP2B                              |                                                    | SLC25A5-AS1                        |
| TNFSF8                                             | UNQ6494                            |                                                    | TOB1                               |
| TP53INP1                                           | MAD1L1                             |                                                    | PNPLA7                             |
| ELF3                                               | NHLH2                              |                                                    | TEX13B                             |
| DDIT4                                              | TNFSF8                             |                                                    | SULF1                              |
| DAPL1                                              | TP53INP1                           |                                                    | HSPB1                              |
| NEAT1                                              | ELF3                               |                                                    | KRT18                              |
| LOC101928855                                       | DDIT4                              |                                                    |                                    |

**Supplementary Table 2: Primers used in real-time PCR**

| <b>Gene</b> | <b>FW</b>                | <b>RV</b>              |
|-------------|--------------------------|------------------------|
| PUMA        | AACTGAAAAAGAAACGGAATGGAA | CTCCCTGGGGCCACAAATC    |
| BAX         | GCCCTTTTGCTTCAGGGTTTC    | TGAGACACTCGCTCAGCTTC   |
| PAI1        | ACAACCCACAGGAACAGTC      | GATGAAGGCGTCTTTCCCA    |
| PML         | TGGACGAGAACCTTGCTGAC     | GCTGGCTAATCTTCTGGGTTTC |
| GADD45A     | AAGGATGGATAAGGTGGGGGA    | CACGTTATCGGGGTCGACGTT  |
| p53         | ACGCTCCCTGGATTGGCAGC     | GAGGGGGCTCGACGCTAGGA   |
| RAP2B       | AAAAGCCAAACGCATCCGAC     | CTGGCCAATGCAAAGTGGTC   |
| GADD45A     | ACGATCACTGTCGGGGTGTA     | CCACATCTCTGTCGTCGTCC   |
| p21         | CCAGCCTCTGGCATTAGAATT    | CGGGATGAGGAGGCTTTAAAT  |
